# Supplementary material for: Transients drive the demographic dynamics of plant populations in variable environments
Source: PubMed Central journal article supplement (PMC4768644; doi:10.1111/1365-2745.12528), 2016-02-22

Frequency

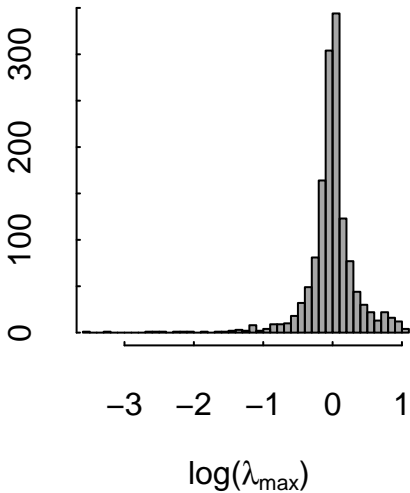

Supplement: JEC-104-306-s001.pdf [file JEC-104-306-s001.pdf]
